# Supplementary material for: ASA3P: An automatic and scalable pipeline for the assembly, annotation and higher-level analysis of closely related bacterial isolates
Source: PLoS Comput Biol. 2020 Mar 5;16(3):e1007134. doi: 10.1371/journal.pcbi.1007134 (PMC7077848; doi:10.1371/journal.pcbi.1007134)
Supplement: S1 File — (XLS) [file pcbi.1007134.s009.xls]

## Sheet: QC
ID	Genome	# Reads	Lengths			GC [%]	Quality [PHRED]			Potential Contamination [%]
			min	mean	max		min	mean	max
1	L. monocytogenes SRR3330409	1663724	20	189.2	251	38	30	35.4	37	0
2	L. monocytogenes SRR1810516	1146854	20	213	251	39	31	36.5	37	0
3	L. monocytogenes SRR2924581	803494	20	203.1	251	38	30	36.1	37	0
4	L. monocytogenes SRR3101601	2080098	20	165.8	251	39	30	36.7	38	0
5	L. monocytogenes SRR3634446	2011954	20	186.4	251	38	29	35.4	37	0
6	L. monocytogenes SRR3181835	3687388	20	186.2	251	38	32	36.4	37	0
7	L. monocytogenes SRR2982078	6315924	20	194.9	251	38	31	36.8	38	0
8	L. monocytogenes SRR3574517	3770458	20	128.9	151	38	31	36.9	38	0
9	L. monocytogenes SRR1575973	1193048	20	170.6	251	38	31	36.5	37	0
10	L. monocytogenes SRR3930175	1804050	20	216	251	38	31	36.4	38	0
11	L. monocytogenes SRR1973978	1215988	20	203.8	251	38	31	36	38	0
12	L. monocytogenes SRR2140707	4997310	20	182.1	251	38	31	37.1	38	0
13	L. monocytogenes SRR2976738	1820264	20	181.7	251	38	31	36.5	37	0
14	L. monocytogenes SRR2636959	1581810	20	218.8	251	38	31	36.7	38	0
15	L. monocytogenes SRR3173568	2065226	20	224.6	251	38	31	36.9	38	0
16	L. monocytogenes SRR3928673	1087734	20	196.2	251	38	31	36.1	38	0
17	L. monocytogenes SRR1709558	2016294	20	179.1	251	38	30	35.6	37	0
18	L. monocytogenes SRR1514752	2160894	20	209.1	251	38	31	36.9	38	0
19	L. monocytogenes SRR3489851	932234	20	217	301	38	29	35.5	37	0
20	L. monocytogenes SRR1811627	3524446	20	175	251	39	32	37.2	38	0
21	L. monocytogenes SRR2878357	1564472	20	135	251	38	31	36	37	0.6
22	L. monocytogenes SRR1272887	1157356	20	165.4	251	38.5	25	35.6	38	0
23	L. monocytogenes SRR3147168	927346	20	182.2	251	38.5	30	35.5	37	1
24	L. monocytogenes SRR2533768	999704	20	228.5	251	39	31	36.8	38	0
25	L. monocytogenes SRR1569796	1610350	1	223	251	37	31	37.2	38	0
26	L. monocytogenes SRR1763858	4992070	20	209.8	251	38	30	36.8	38	0
27	L. monocytogenes SRR3395006	393300	20	145	151	38	31	34.7	35	0
28	L. monocytogenes SRR3930198	2727600	20	179.8	251	38	31	36.6	37	0
29	L. monocytogenes SRR2861532	2592680	20	127.5	151	38	30	36.9	38	0
30	L. monocytogenes SRR2562281	1868568	20	125.7	151	38	30	36.2	37	0
31	L. monocytogenes SRR3453146	2060092	20	196.3	251	38	30	36.5	38	0
32	L. monocytogenes SRR3137565	1727074	20	178.3	251	38	30	35.8	37	0

## Sheet: Assembly
ID	Genome	# Contigs	N50 Cov	N50	Genome Size	GC [%]
1	L. monocytogenes SRR3330409	19	38	345992	2896690	38
2	L. monocytogenes SRR1810516	20	31	513368	3086657	38
3	L. monocytogenes SRR2924581	28	19	509539	3023654	38
4	L. monocytogenes SRR3101601	85	38	66196	2855624	38
5	L. monocytogenes SRR3634446	23	45	438161	2935600	38
6	L. monocytogenes SRR3181835	54	80	261717	3027510	38
7	L. monocytogenes SRR2982078	27	144	372909	3079427	38
8	L. monocytogenes SRR3574517	50	65	503866	3167548	38
9	L. monocytogenes SRR1575973	16	21	1468329	2893735	38
10	L. monocytogenes SRR3930175	16	52	531970	3024560	38
11	L. monocytogenes SRR1973978	15	29	1534482	3062268	38
12	L. monocytogenes SRR2140707	21	104	357768	3115231	38
13	L. monocytogenes SRR2976738	18	39	509235	2930819	38
14	L. monocytogenes SRR2636959	23	45	730512	3026942	38
15	L. monocytogenes SRR3173568	20	64	541525	2983528	38
16	L. monocytogenes SRR3928673	31	23	530687	3201054	38
17	L. monocytogenes SRR1709558	12	43	1451795	2817892	38
18	L. monocytogenes SRR1514752	16	65	502479	2902429	38
19	L. monocytogenes SRR3489851	25	27	479602	3024823	38
20	L. monocytogenes SRR1811627	31	66	474875	2852326	38
21	L. monocytogenes SRR2878357	48	17	437570	3052672	38
22	L. monocytogenes SRR1272887	108	22	56125	3047580	38
23	L. monocytogenes SRR3147168	89	21	147924	3048437	38
24	L. monocytogenes SRR2533768	18	30	1568056	3113752	38
25	L. monocytogenes SRR1569796	18	50	581294	2922867	37
26	L. monocytogenes SRR1763858	19	141	1509193	2957487	38
27	L. monocytogenes SRR3395006	47	9	339693	2976223	38
28	L. monocytogenes SRR3930198	27	57	394020	3032825	38
29	L. monocytogenes SRR2861532	27	44	557836	2960302	38
30	L. monocytogenes SRR2562281	32	32	408611	2935758	38
31	L. monocytogenes SRR3453146	30	51	598457	2940799	38
32	L. monocytogenes SRR3137565	33	34	353995	3000942	38

## Sheet: Scaffolding
ID	Genome	# Scaffolds	# Contigs	N50
1	L. monocytogenes SRR3330409	5	0	1910006
2	L. monocytogenes SRR1810516	2	5	3014211
3	L. monocytogenes SRR2924581	6	7	1513833
4	L. monocytogenes SRR3101601	7	7	1571277
5	L. monocytogenes SRR3634446	5	1	2163158
6	L. monocytogenes SRR3181835	7	23	1721360
7	L. monocytogenes SRR2982078	6	5	1630876
8	L. monocytogenes SRR3574517	5	25	1053014
9	L. monocytogenes SRR1575973	3	1	2115661
10	L. monocytogenes SRR3930175	2	2	2435857
11	L. monocytogenes SRR1973978	5	4	1632369
12	L. monocytogenes SRR2140707	5	2	1577250
13	L. monocytogenes SRR2976738	4	5	2159532
14	L. monocytogenes SRR2636959	5	5	785059
15	L. monocytogenes SRR3173568	4	4	2172609
16	L. monocytogenes SRR3928673	3	12	3034489
17	L. monocytogenes SRR1709558	3	0	2099034
18	L. monocytogenes SRR1514752	4	3	1566025
19	L. monocytogenes SRR3489851	5	2	1518879
20	L. monocytogenes SRR1811627	6	2	2778820
21	L. monocytogenes SRR2878357	9	6	756627
22	L. monocytogenes SRR1272887	9	15	935801
23	L. monocytogenes SRR3147168	5	42	1615793
24	L. monocytogenes SRR2533768	5	5	1723847
25	L. monocytogenes SRR1569796	3	6	2140256
26	L. monocytogenes SRR1763858	4	2	1611405
27	L. monocytogenes SRR3395006	10	6	697163
28	L. monocytogenes SRR3930198	3	7	1984717
29	L. monocytogenes SRR2861532	6	0	657549
30	L. monocytogenes SRR2562281	8	2	1905290
31	L. monocytogenes SRR3453146	1	10	2937507
32	L. monocytogenes SRR3137565	6	8	2506721

## Sheet: Annotation
ID	Genome	# Genes	# CDS	# Hyp. Proteins	# ncRNA	# CRISPR/CAS	# rRNA	# tRNA
1	L. monocytogenes SRR3330409	2991	2830	329	95	0	6	59
2	L. monocytogenes SRR1810516	3193	3022	408	98	0	7	65
3	L. monocytogenes SRR2924581	3167	2994	402	109	2	8	55
4	L. monocytogenes SRR3101601	2983	2818	325	100	0	7	57
5	L. monocytogenes SRR3634446	3024	2859	350	96	0	6	62
6	L. monocytogenes SRR3181835	3161	2989	386	99	1	7	65
7	L. monocytogenes SRR2982078	3235	3020	369	144	3	7	63
8	L. monocytogenes SRR3574517	3320	3150	458	100	0	5	64
9	L. monocytogenes SRR1575973	3036	2859	364	110	3	7	59
10	L. monocytogenes SRR3930175	3177	2976	366	130	5	6	64
11	L. monocytogenes SRR1973978	3196	3024	417	99	1	7	65
12	L. monocytogenes SRR2140707	3264	3091	482	102	1	8	62
13	L. monocytogenes SRR2976738	3032	2869	326	100	2	8	54
14	L. monocytogenes SRR2636959	3179	2996	403	111	2	7	64
15	L. monocytogenes SRR3173568	3085	2910	352	103	2	8	63
16	L. monocytogenes SRR3928673	3368	3200	503	101	1	7	59
17	L. monocytogenes SRR1709558	2901	2735	299	96	1	7	62
18	L. monocytogenes SRR1514752	3009	2842	329	98	1	6	62
19	L. monocytogenes SRR3489851	3169	2970	380	126	4	7	65
20	L. monocytogenes SRR1811627	2964	2770	317	122	3	7	64
21	L. monocytogenes SRR2878357	3273	3067	440	134	2	8	63
22	L. monocytogenes SRR1272887	3190	3032	410	97	1	7	53
23	L. monocytogenes SRR3147168	3200	3020	419	108	3	8	63
24	L. monocytogenes SRR2533768	3268	3095	423	99	1	7	66
25	L. monocytogenes SRR1569796	3060	2900	411	95	1	7	57
26	L. monocytogenes SRR1763858	3091	2920	371	99	1	8	63
27	L. monocytogenes SRR3395006	3075	2908	364	96	2	5	65
28	L. monocytogenes SRR3930198	3173	2992	374	109	2	7	64
29	L. monocytogenes SRR2861532	3096	2925	364	100	1	6	64
30	L. monocytogenes SRR2562281	3035	2867	368	99	0	5	63
31	L. monocytogenes SRR3453146	3083	2895	391	116	1	8	63
32	L. monocytogenes SRR3137565	3128	2949	379	107	2	7	64

## Sheet: Taxonomy
ID	Genome	Kmer	16S rRNA	Best Reference	ANI [%]	Conserved DNA [%]
1	L. monocytogenes SRR3330409	Listeria monocytogenes SLCC2540	Listeria monocytogenes SLCC2540	NZ_CP019615-Listeria-monocytogenes-strain-10-092876-0168	99.6	97.3
2	L. monocytogenes SRR1810516	Listeria monocytogenes	Listeria monocytogenes SLCC2540	NZ_CP019615-Listeria-monocytogenes-strain-10-092876-0168	99.5	91.9
3	L. monocytogenes SRR2924581	Listeria monocytogenes	Listeria monocytogenes SLCC2540	NC_003210-Listeria-monocytogenes-EGDe	98.9	90.4
4	L. monocytogenes SRR3101601	Listeria monocytogenes SLCC7179	Listeria monocytogenes SLCC7179	NC_003210-Listeria-monocytogenes-EGDe	99	96.5
5	L. monocytogenes SRR3634446	Listeria monocytogenes	Listeria monocytogenes SLCC2376	NC_003210-Listeria-monocytogenes-EGDe	99.5	96.7
6	L. monocytogenes SRR3181835	Listeria monocytogenes	Listeria monocytogenes SLCC2540	NZ_CP019615-Listeria-monocytogenes-strain-10-092876-0168	99.5	93.9
7	L. monocytogenes SRR2982078	Listeria monocytogenes	Listeria monocytogenes SLCC2540	NZ_CP019615-Listeria-monocytogenes-strain-10-092876-0168	99.5	91.9
8	L. monocytogenes SRR3574517	Listeria monocytogenes	Listeria monocytogenes SLCC2540	NZ_CP019615-Listeria-monocytogenes-strain-10-092876-0168	99.5	89.3
9	L. monocytogenes SRR1575973	Listeria monocytogenes 6179	Listeria monocytogenes SLCC2376	NZ_CP019615-Listeria-monocytogenes-strain-10-092876-0168	95.3	80.8
10	L. monocytogenes SRR3930175	Listeria monocytogenes 6179	Listeria monocytogenes SLCC2540	NZ_CP019164-Listeria-monocytogenes-strain-HPB2088	98.7	91.2
11	L. monocytogenes SRR1973978	Listeria monocytogenes	Listeria monocytogenes SLCC2540	NZ_CP019615-Listeria-monocytogenes-strain-10-092876-0168	99.5	92.6
12	L. monocytogenes SRR2140707	Listeria monocytogenes	Listeria monocytogenes J1776	NZ_CP019615-Listeria-monocytogenes-strain-10-092876-0168	99.5	88.9
13	L. monocytogenes SRR2976738	Listeria monocytogenes	Listeria monocytogenes SLCC2540	NZ_CP019615-Listeria-monocytogenes-strain-10-092876-0168	99.5	94.4
14	L. monocytogenes SRR2636959	Listeria monocytogenes	Listeria monocytogenes SLCC2479	NC_003210-Listeria-monocytogenes-EGDe	98.9	91.2
15	L. monocytogenes SRR3173568	Listeria monocytogenes	Listeria monocytogenes SLCC2479	NZ_CP019164-Listeria-monocytogenes-strain-HPB2088	98.8	92
16	L. monocytogenes SRR3928673	Listeria monocytogenes	Listeria monocytogenes SLCC2540	NZ_CP019615-Listeria-monocytogenes-strain-10-092876-0168	99.4	88.9
17	L. monocytogenes SRR1709558	Listeria monocytogenes	Listeria monocytogenes SLCC2376	NZ_CP019615-Listeria-monocytogenes-strain-10-092876-0168	95.3	82.7
18	L. monocytogenes SRR1514752	Listeria monocytogenes SLCC2540	Listeria monocytogenes SLCC2540	NZ_CP019615-Listeria-monocytogenes-strain-10-092876-0168	99.5	97.1
19	L. monocytogenes SRR3489851	Listeria monocytogenes 6179	Listeria monocytogenes SLCC2479	NC_003210-Listeria-monocytogenes-EGDe	98.7	91.3
20	L. monocytogenes SRR1811627	Listeria monocytogenes	Listeria monocytogenes SLCC2540	NC_003210-Listeria-monocytogenes-EGDe	99	96.5
21	L. monocytogenes SRR2878357	Listeria monocytogenes	Listeria monocytogenes SLCC2540	NC_022568-Listeria-monocytogenes-EGD	99.9	93.5
22	L. monocytogenes SRR1272887	Listeria monocytogenes	Listeria monocytogenes SLCC2540	NZ_CP019615-Listeria-monocytogenes-strain-10-092876-0168	99.5	93.2
23	L. monocytogenes SRR3147168	Listeria monocytogenes	Listeria monocytogenes SLCC2540	NC_003210-Listeria-monocytogenes-EGDe	99	91.7
24	L. monocytogenes SRR2533768	Listeria monocytogenes	Listeria monocytogenes SLCC2540	NZ_CP019615-Listeria-monocytogenes-strain-10-092876-0168	99.5	91.1
25	L. monocytogenes SRR1569796	Listeria innocua Clip11262	Listeria innocua L43	NZ_CP019615-Listeria-monocytogenes-strain-10-092876-0168	90.7	37.3
26	L. monocytogenes SRR1763858	Listeria monocytogenes	Listeria monocytogenes J1776	NZ_CP019615-Listeria-monocytogenes-strain-10-092876-0168	99.5	93.1
27	L. monocytogenes SRR3395006	Listeria monocytogenes	Listeria monocytogenes SLCC2479	NC_003210-Listeria-monocytogenes-EGDe	99.9	95.6
28	L. monocytogenes SRR3930198	Listeria monocytogenes	Listeria monocytogenes SLCC2540	NZ_CP019615-Listeria-monocytogenes-strain-10-092876-0168	99.7	95.5
29	L. monocytogenes SRR2861532	Listeria monocytogenes	Listeria monocytogenes J1776	NZ_CP019615-Listeria-monocytogenes-strain-10-092876-0168	99.5	93.1
30	L. monocytogenes SRR2562281	Listeria monocytogenes SLCC2540	Listeria monocytogenes SLCC2540	NZ_CP019615-Listeria-monocytogenes-strain-10-092876-0168	99.5	93.3
31	L. monocytogenes SRR3453146	Listeria monocytogenes	Listeria monocytogenes serotype 4b str. CLIP 80459 Clip80459	NZ_CP019164-Listeria-monocytogenes-strain-HPB2088	98.8	93.3
32	L. monocytogenes SRR3137565	Listeria monocytogenes	Listeria monocytogenes SLCC2540	NZ_CP019615-Listeria-monocytogenes-strain-10-092876-0168	99.8	96.4

## Sheet: MLST
ID	Genome	MLST Scheme	Sequence Type	MLST Alleles	Clonal Cluster	Lineage
1	L. monocytogenes SRR3330409	lmonocytogenes	392	abcZ(2) bglA(4) cat(12) dapE(3) dat(3) ldh(94) lhkA(2)	CC392	I
2	L. monocytogenes SRR1810516	lmonocytogenes	5	abcZ(2) bglA(1) cat(11) dapE(3) dat(3) ldh(1) lhkA(7)	CC5	I
3	L. monocytogenes SRR2924581	lmonocytogenes	155	abcZ(7) bglA(10) cat(16) dapE(7) dat(5) ldh(2) lhkA(1)	CC155	II
4	L. monocytogenes SRR3101601	lmonocytogenes	91	abcZ(7) bglA(6) cat(15) dapE(6) dat(5) ldh(2) lhkA(1)	CC14	II
5	L. monocytogenes SRR3634446	lmonocytogenes	204	abcZ(5) bglA(7) cat(6) dapE(4) dat(5) ldh(4) lhkA(1)	CC204	II
6	L. monocytogenes SRR3181835	lmonocytogenes	5	abcZ(2) bglA(1) cat(11) dapE(3) dat(3) ldh(1) lhkA(7)	CC5	I
7	L. monocytogenes SRR2982078	lmonocytogenes	281	abcZ(4) bglA(4) cat(4) dapE(57) dat(2) ldh(1) lhkA(5)	CC3	I
8	L. monocytogenes SRR3574517	lmonocytogenes	5	abcZ(2) bglA(1) cat(11) dapE(3) dat(3) ldh(1) lhkA(7)	CC5	I
9	L. monocytogenes SRR1575973
10	L. monocytogenes SRR3930175	lmonocytogenes	121	abcZ(7) bglA(6) cat(8) dapE(8) dat(6) ldh(37) lhkA(1)	CC121	II
11	L. monocytogenes SRR1973978	lmonocytogenes	5	abcZ(2) bglA(1) cat(11) dapE(3) dat(3) ldh(1) lhkA(7)	CC5	I
12	L. monocytogenes SRR2140707	lmonocytogenes	1	abcZ(3) bglA(1) cat(1) dapE(1) dat(3) ldh(1) lhkA(3)	CC1	I
13	L. monocytogenes SRR2976738	lmonocytogenes	219	abcZ(1) bglA(2) cat(9) dapE(1) dat(2) ldh(5) lhkA(3)	CC4	I
14	L. monocytogenes SRR2636959	lmonocytogenes	155	abcZ(7) bglA(10) cat(16) dapE(7) dat(5) ldh(2) lhkA(1)	CC155	II
15	L. monocytogenes SRR3173568	lmonocytogenes	14	abcZ(8) bglA(6) cat(13) dapE(6) dat(5) ldh(2) lhkA(1)	CC14	II
16	L. monocytogenes SRR3928673	lmonocytogenes	5	abcZ(2) bglA(1) cat(11) dapE(3) dat(3) ldh(1) lhkA(7)	CC5	I
17	L. monocytogenes SRR1709558	lmonocytogenes	71	abcZ(18) bglA(11) cat(21) dapE(24) dat(17) ldh(35) lhkA(13)	CC131	III
18	L. monocytogenes SRR1514752	lmonocytogenes	392	abcZ(2) bglA(4) cat(12) dapE(3) dat(3) ldh(94) lhkA(2)	CC392	I
19	L. monocytogenes SRR3489851	lmonocytogenes	121	abcZ(7) bglA(6) cat(8) dapE(8) dat(6) ldh(37) lhkA(1)	CC121	II
20	L. monocytogenes SRR1811627	lmonocytogenes	1082	abcZ(93) bglA(15) cat(17) dapE(212) dat(1) ldh(6) lhkA(1)	ST1082	II
21	L. monocytogenes SRR2878357	lmonocytogenes	7	abcZ(5) bglA(8) cat(5) dapE(7) dat(6) ldh(2) lhkA(1)	CC7	II
22	L. monocytogenes SRR1272887	lmonocytogenes	5	abcZ(2) bglA(1) cat(11) dapE(3) dat(3) ldh(1) lhkA(7)	CC5	I
23	L. monocytogenes SRR3147168	lmonocytogenes	321	abcZ(5) bglA(6) cat(8) dapE(62) dat(6) ldh(7) lhkA(34)	CC321	II
24	L. monocytogenes SRR2533768	lmonocytogenes	5	abcZ(2) bglA(1) cat(11) dapE(3) dat(3) ldh(1) lhkA(7)	CC5	I
25	L. monocytogenes SRR1569796	lmonocytogenes	1092	abcZ(201) bglA(169) cat(85) dapE(237) dat(149) ldh(369) lhkA(159)	ST1092	L. innocua
26	L. monocytogenes SRR1763858	lmonocytogenes	1	abcZ(3) bglA(1) cat(1) dapE(1) dat(3) ldh(1) lhkA(3)	CC1	I
27	L. monocytogenes SRR3395006	lmonocytogenes	9	abcZ(6) bglA(5) cat(6) dapE(4) dat(1) ldh(4) lhkA(1)	CC9	II
28	L. monocytogenes SRR3930198	lmonocytogenes	88	abcZ(12) bglA(12) cat(12) dapE(1) dat(3) ldh(1) lhkA(4)	CC88	I
29	L. monocytogenes SRR2861532	lmonocytogenes	1	abcZ(3) bglA(1) cat(1) dapE(1) dat(3) ldh(1) lhkA(3)	CC1	I
30	L. monocytogenes SRR2562281	lmonocytogenes	554	abcZ(2) bglA(1) cat(9) dapE(1) dat(3) ldh(5) lhkA(5)	CC554	I
31	L. monocytogenes SRR3453146	lmonocytogenes	101	abcZ(7) bglA(15) cat(15) dapE(8) dat(6) ldh(14) lhkA(9)	CC101	II
32	L. monocytogenes SRR3137565	lmonocytogenes	88	abcZ(12) bglA(12) cat(12) dapE(1) dat(3) ldh(1) lhkA(4)	CC88	I

## Sheet: ABR
ID	Genome	# ABR Genes	# Non-perfect ABR Gene Hits
1	L. monocytogenes SRR3330409	1	3
2	L. monocytogenes SRR1810516	1	3
3	L. monocytogenes SRR2924581	1	3
4	L. monocytogenes SRR3101601	1	3
5	L. monocytogenes SRR3634446	2	2
6	L. monocytogenes SRR3181835	1	3
7	L. monocytogenes SRR2982078	0	5
8	L. monocytogenes SRR3574517	1	3
9	L. monocytogenes SRR1575973	0	4
10	L. monocytogenes SRR3930175	1	3
11	L. monocytogenes SRR1973978	1	3
12	L. monocytogenes SRR2140707	1	3
13	L. monocytogenes SRR2976738	1	3
14	L. monocytogenes SRR2636959	1	3
15	L. monocytogenes SRR3173568	2	2
16	L. monocytogenes SRR3928673	1	3
17	L. monocytogenes SRR1709558	0	4
18	L. monocytogenes SRR1514752	1	3
19	L. monocytogenes SRR3489851	2	2
20	L. monocytogenes SRR1811627	2	2
21	L. monocytogenes SRR2878357	2	2
22	L. monocytogenes SRR1272887	1	3
23	L. monocytogenes SRR3147168	2	2
24	L. monocytogenes SRR2533768	1	3
25	L. monocytogenes SRR1569796	0	4
26	L. monocytogenes SRR1763858	1	3
27	L. monocytogenes SRR3395006	2	2
28	L. monocytogenes SRR3930198	1	3
29	L. monocytogenes SRR2861532	1	3
30	L. monocytogenes SRR2562281	1	3
31	L. monocytogenes SRR3453146	2	2
32	L. monocytogenes SRR3137565	1	3

## Sheet: VF
ID	Genome	# VFs	# VF Categories
1	L. monocytogenes SRR3330409	28	27
2	L. monocytogenes SRR1810516	27	27
3	L. monocytogenes SRR2924581	32	31
4	L. monocytogenes SRR3101601	32	32
5	L. monocytogenes SRR3634446	32	31
6	L. monocytogenes SRR3181835	27	27
7	L. monocytogenes SRR2982078	35	30
8	L. monocytogenes SRR3574517	27	26
9	L. monocytogenes SRR1575973	30	25
10	L. monocytogenes SRR3930175	30	30
11	L. monocytogenes SRR1973978	27	27
12	L. monocytogenes SRR2140707	31	26
13	L. monocytogenes SRR2976738	31	26
14	L. monocytogenes SRR2636959	32	31
15	L. monocytogenes SRR3173568	30	30
16	L. monocytogenes SRR3928673	27	27
17	L. monocytogenes SRR1709558	22	22
18	L. monocytogenes SRR1514752	28	28
19	L. monocytogenes SRR3489851	31	30
20	L. monocytogenes SRR1811627	30	30
21	L. monocytogenes SRR2878357	31	31
22	L. monocytogenes SRR1272887	27	27
23	L. monocytogenes SRR3147168	31	31
24	L. monocytogenes SRR2533768	27	27
25	L. monocytogenes SRR1569796	16	10
26	L. monocytogenes SRR1763858	31	26
27	L. monocytogenes SRR3395006	33	32
28	L. monocytogenes SRR3930198	28	28
29	L. monocytogenes SRR2861532	31	26
30	L. monocytogenes SRR2562281	33	28
31	L. monocytogenes SRR3453146	32	32
32	L. monocytogenes SRR3137565	28	28

## Sheet: Mappings
ID	Genome	# Reads	# Unique	# Multiple	# Unmapped	Ratio
1	L. monocytogenes SRR3330409	1663724	1338771	33927	291026	82.5
2	L. monocytogenes SRR1810516	1146854	903778	22428	220648	80.8
3	L. monocytogenes SRR2924581	803494	683719	12342	107433	86.6
4	L. monocytogenes SRR3101601	2080098	1947082	42831	90185	95.7
5	L. monocytogenes SRR3634446	2011954	1895683	39865	76406	96.2
6	L. monocytogenes SRR3181835	3687388	2918102	48237	721049	80.4
7	L. monocytogenes SRR2982078	6315924	4949110	98517	1268297	79.9
8	L. monocytogenes SRR3574517	3770458	2766355	60250	943853	75
9	L. monocytogenes SRR1575973	1193048	799806	20115	373127	68.7
10	L. monocytogenes SRR3930175	1804050	1628517	36160	139373	92.3
11	L. monocytogenes SRR1973978	1215988	958181	16058	241749	80.1
12	L. monocytogenes SRR2140707	4997310	3800396	84116	1112798	77.7
13	L. monocytogenes SRR2976738	1820264	1411380	26918	381966	79
14	L. monocytogenes SRR2636959	1581810	1404164	25325	152321	90.4
15	L. monocytogenes SRR3173568	2065226	1871959	31832	161435	92.2
16	L. monocytogenes SRR3928673	1087734	706970	10893	369871	66
17	L. monocytogenes SRR1709558	2016294	1458885	31465	525944	73.9
18	L. monocytogenes SRR1514752	2160894	1772312	31936	356646	83.5
19	L. monocytogenes SRR3489851	932234	812711	17365	102158	89
20	L. monocytogenes SRR1811627	3524446	3305808	72180	146458	95.8
21	L. monocytogenes SRR2878357	1564472	1372868	30685	160919	89.7
22	L. monocytogenes SRR1272887	1157356	897769	18572	241015	79.2
23	L. monocytogenes SRR3147168	927346	841399	18300	67647	92.7
24	L. monocytogenes SRR2533768	999704	778940	17316	203448	79.6
25	L. monocytogenes SRR1569796	1610350	650011	19879	940460	41.6
26	L. monocytogenes SRR1763858	4992070	3931871	77944	982255	80.3
27	L. monocytogenes SRR3395006	393300	366594	7608	19098	95.1
28	L. monocytogenes SRR3930198	2727600	2100696	33416	593488	78.2
29	L. monocytogenes SRR2861532	2592680	1913214	38013	641453	75.3
30	L. monocytogenes SRR2562281	1868568	1381158	30339	457071	75.5
31	L. monocytogenes SRR3453146	2060092	1864581	33645	161866	92.1
32	L. monocytogenes SRR3137565	1727074	1350271	29438	347365	79.9

## Sheet: SNPs
ID	Genome	SNPs	HI SNPs	TS/TV	Change Range
1	L. monocytogenes SRR3330409	57725	57	2.3	50
2	L. monocytogenes SRR1810516	56489	39	2.3	51
3	L. monocytogenes SRR2924581	16941	17	2.3	173
4	L. monocytogenes SRR3101601	15889	19	2.4	185
5	L. monocytogenes SRR3634446	8780	16	2.4	334
6	L. monocytogenes SRR3181835	55253	35	2.4	53
7	L. monocytogenes SRR2982078	56028	35	2.4	52
8	L. monocytogenes SRR3574517	57096	39	2.4	51
9	L. monocytogenes SRR1575973	39117	19	2.3	74
10	L. monocytogenes SRR3930175	22971	16	2.3	127
11	L. monocytogenes SRR1973978	58243	40	2.3	50
12	L. monocytogenes SRR2140707	55398	34	2.4	53
13	L. monocytogenes SRR2976738	55877	38	2.4	52
14	L. monocytogenes SRR2636959	17825	16	2.3	165
15	L. monocytogenes SRR3173568	22038	9	2.3	133
16	L. monocytogenes SRR3928673	56148	33	2.3	52
17	L. monocytogenes SRR1709558	39744	41	2.3	73
18	L. monocytogenes SRR1514752	55927	61	2.3	52
19	L. monocytogenes SRR3489851	21910	17	2.3	134
20	L. monocytogenes SRR1811627	17226	9	2.4	170
21	L. monocytogenes SRR2878357	17680	12	2.3	166
22	L. monocytogenes SRR1272887	51170	50	2.3	56
23	L. monocytogenes SRR3147168	16403	15	2.4	178
24	L. monocytogenes SRR2533768	52414	34	2.4	56
25	L. monocytogenes SRR1569796	17184	11	2.1	169
26	L. monocytogenes SRR1763858	56999	34	2.4	51
27	L. monocytogenes SRR3395006	150	2	3.3	19500
28	L. monocytogenes SRR3930198	57059	44	2.3	51
29	L. monocytogenes SRR2861532	55942	41	2.4	52
30	L. monocytogenes SRR2562281	55908	38	2.4	52
31	L. monocytogenes SRR3453146	20899	16	2.4	140
32	L. monocytogenes SRR3137565	56091	55	2.3	52
