# Supplementary material for: ASA3P: An automatic and scalable pipeline for the assembly, annotation and higher-level analysis of closely related bacterial isolates
Source: PLOS journal article supplement (doi:10.1371/journal.pcbi.1007134), 2020-03-05
Supplement: S2 (10.1371/journal.pcbi.1007134.s002) [file journal.pcbi.1007134.s002]

**S2 Table. Selection of task-specific third party bioinformatics software tools.** Third party bioinformatics software tools selected for each task within ASA<sup>3</sup>P along with a short argumentative reasoning for why was selected.

| <b>Task - Tool</b>                              | <b>Parameters</b>                                                                                                                                                                                                                                                          |
|-------------------------------------------------|----------------------------------------------------------------------------------------------------------------------------------------------------------------------------------------------------------------------------------------------------------------------------|
| QC - Trimmomatic                                | <ul style="list-style-type: none"> <li>- Published</li> <li>- Well performing (due to publication)</li> <li>- Community standards and best practices</li> </ul>                                                                                                            |
| QC - FiltLong                                   | <ul style="list-style-type: none"> <li>- Well performing (broad experience)</li> <li>- One of the first tools available, broadly used</li> </ul>                                                                                                                           |
| QC - FastQC                                     | <ul style="list-style-type: none"> <li>- Well performing (broad experience)</li> <li>- Community standards and best practices</li> <li>- Broad applicability (all sequencing platforms)</li> <li>- Actively maintained</li> </ul>                                          |
| QC - FastQ Screen                               | <ul style="list-style-type: none"> <li>- Well performing (broad experience)</li> <li>- Broad applicability (all sequencing platforms)</li> <li>- Actively maintained</li> </ul>                                                                                            |
| Assembly Illumina - SPAdes                      | <ul style="list-style-type: none"> <li>- Well performing (publication &amp; broad experience)</li> <li>- Community standards and best practices</li> <li>- Actively maintained</li> </ul>                                                                                  |
| Assembly PacBio - HGAP                          | <ul style="list-style-type: none"> <li>- Well performing (publication &amp; broad experience)</li> <li>- One of the first tools available</li> <li>- Actively maintained</li> </ul>                                                                                        |
| Assembly NanoPore/Hybrid (Illumina) - Unicycler | <ul style="list-style-type: none"> <li>- Well performing (publication &amp; broad experience)</li> <li>- Unicycler combines trimming, polishing and dnaA rotation like no other assembly pipeline whilst still being easy to technically integrate</li> </ul>              |
| Scaffolding - MeDuSa                            | <ul style="list-style-type: none"> <li>- Well performing (publication &amp; broad experience)</li> <li>- Supporting multiple references</li> <li>- In contradiction to many other multi-reference scaffolders, MeDuSa is available as a locally executable tool</li> </ul> |
| Annotation - Prokka                             | <ul style="list-style-type: none"> <li>- Well performing (publication &amp; broad experience)</li> <li>- Community standards and best practices</li> <li>- Actively maintained</li> </ul>                                                                                  |
| ABR - CARD rgi                                  | <ul style="list-style-type: none"> <li>- Well designed AMR ontology</li> <li>- All-in-one AMR detection tool (acquired genes, mutation based, efflux pump mediated)</li> <li>- Actively maintained</li> </ul>                                                              |
| Pan/Core Genome calculation - Roary             | <ul style="list-style-type: none"> <li>- Well performing (publication &amp; broad experience)</li> <li>- Community standards and best practices</li> <li>- Computationally applicable for large cohorts</li> <li>- Actively maintained</li> </ul>                          |

|                          |                                                                                                                                                                                                                |
|--------------------------|----------------------------------------------------------------------------------------------------------------------------------------------------------------------------------------------------------------|
| Phylogenomics - FastTree | <ul style="list-style-type: none"><li>- Well performing (publication &amp; broad experience)</li><li>- Computationally applicable for large cohorts</li><li>- Community standards and best practices</li></ul> |
|--------------------------|----------------------------------------------------------------------------------------------------------------------------------------------------------------------------------------------------------------|
